# Supplementary material
Source: PubMed Central journal article supplement (PMC5624508)

Fig 3c

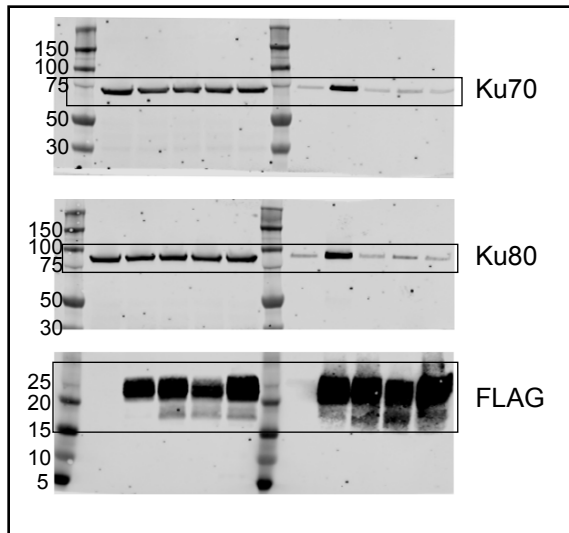

Fig 3f

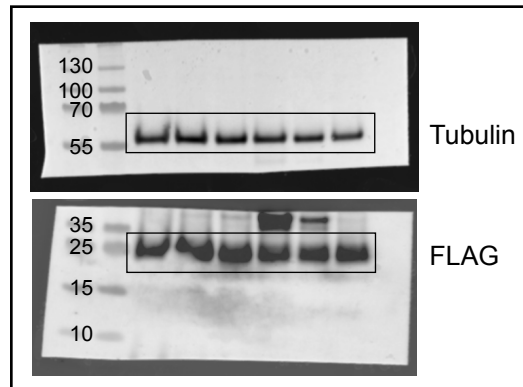

Fig 3g

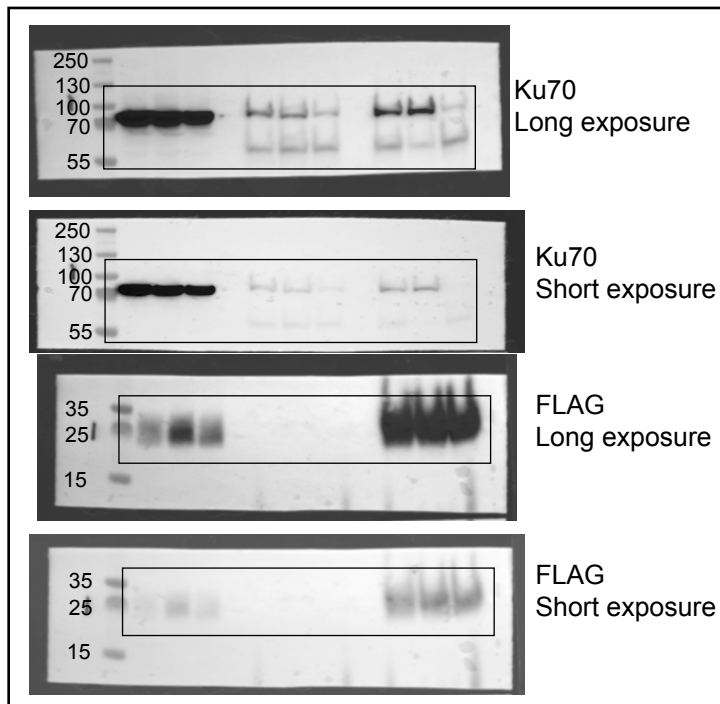

ED Fig 1b

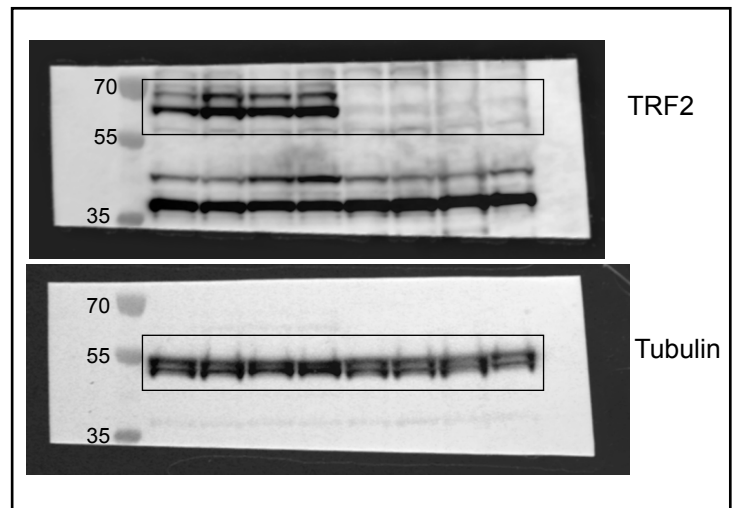

ED Fig 2a

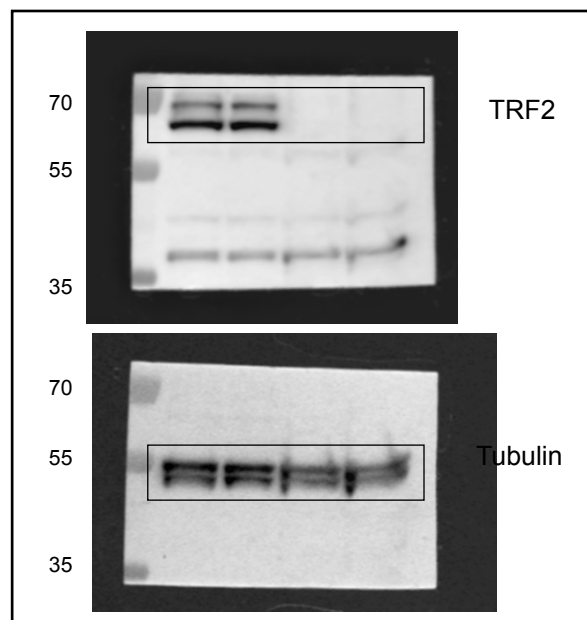

ED Fig 3c

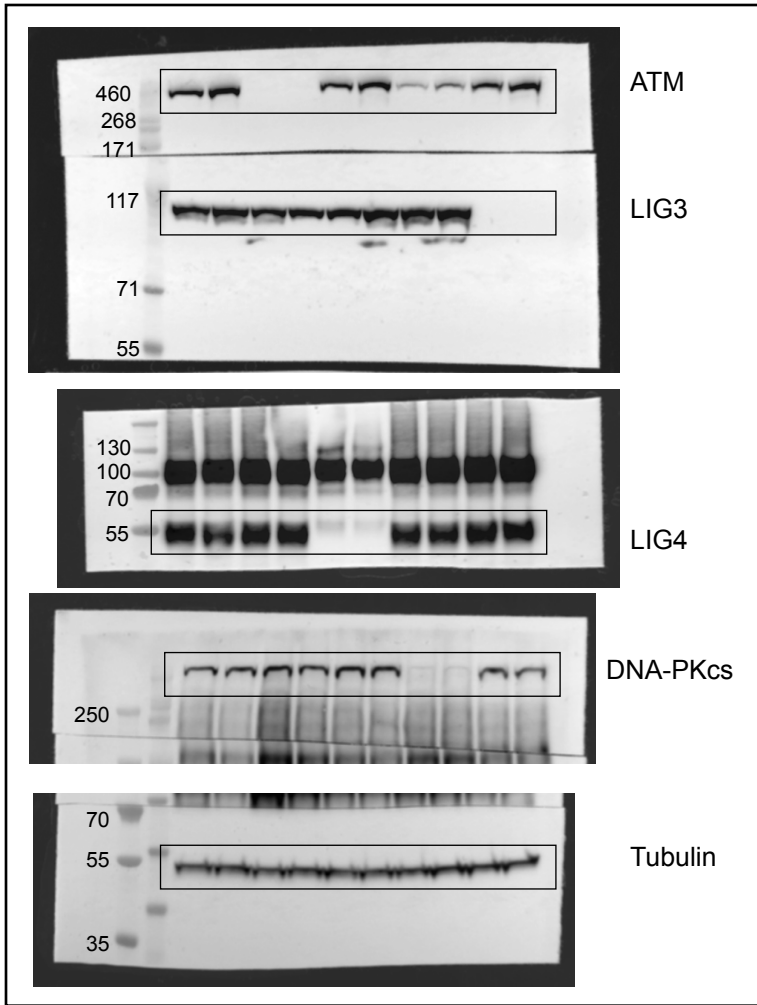

ED Fig 6a

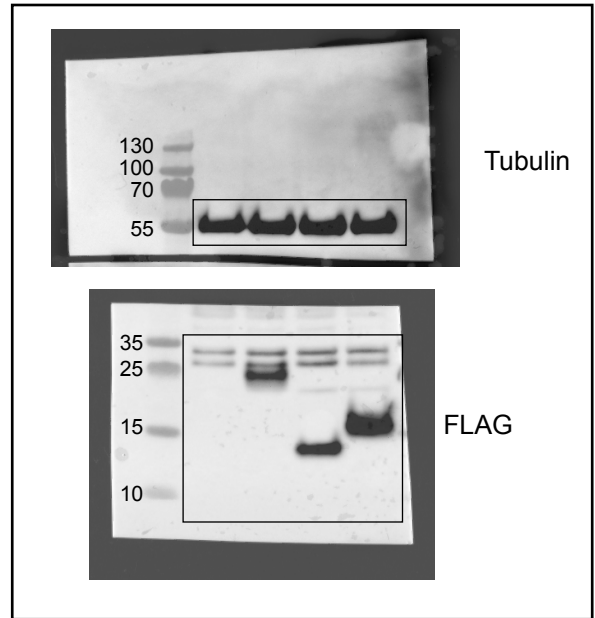

ED Fig 6e-i

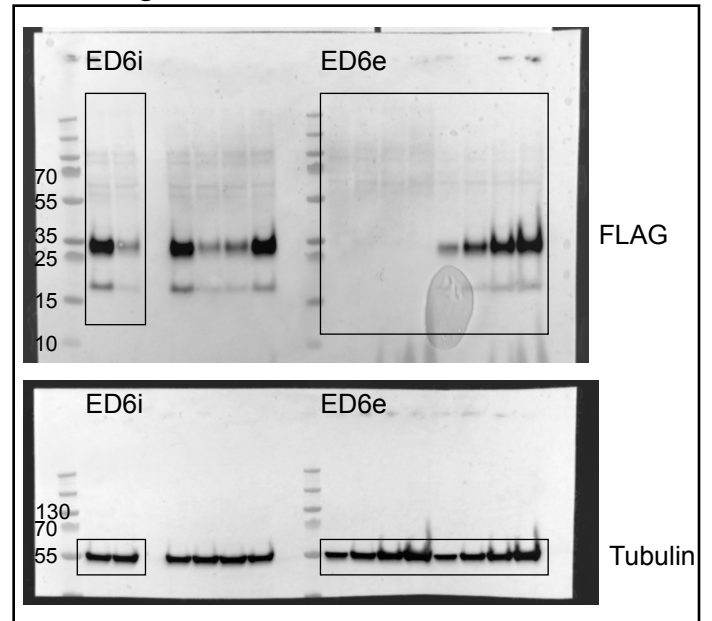

ED Fig 6h

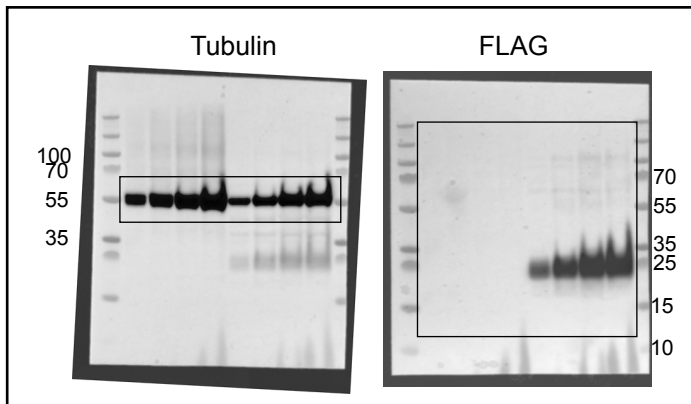

ED Fig 7a

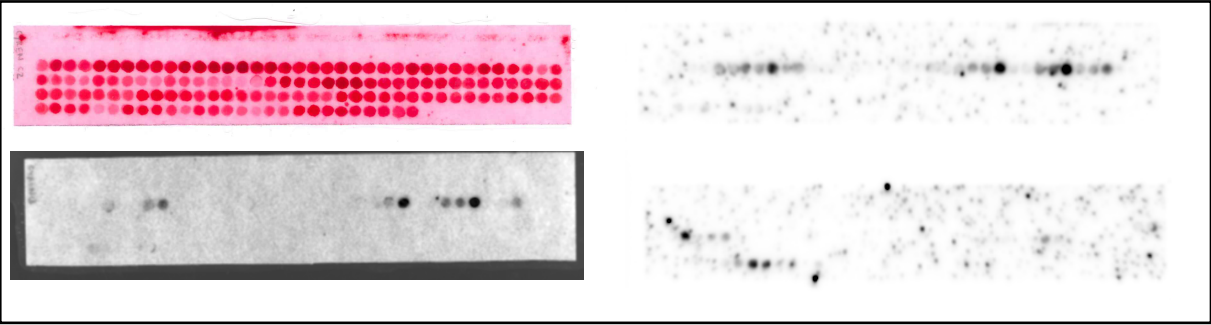

ED Fig 7d

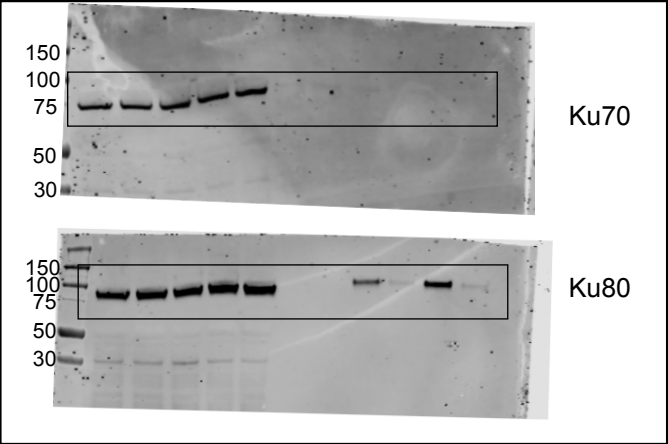

ED Fig 7f

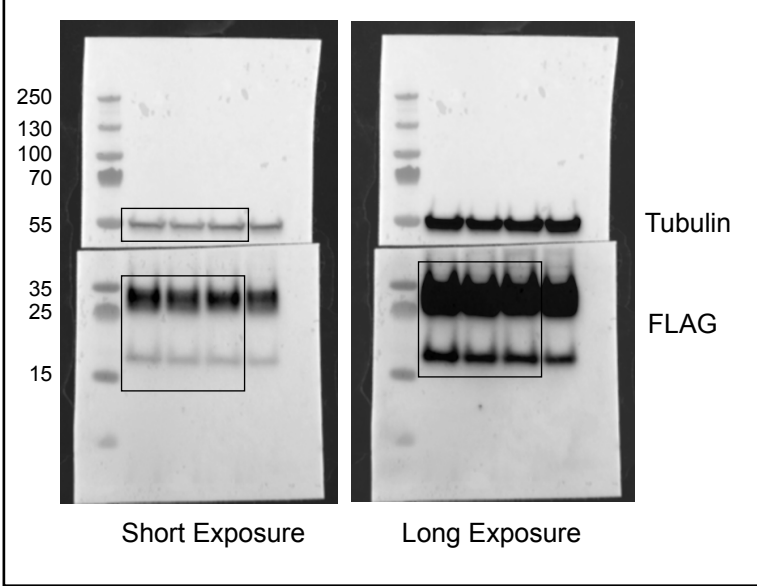

ED Fig 7b

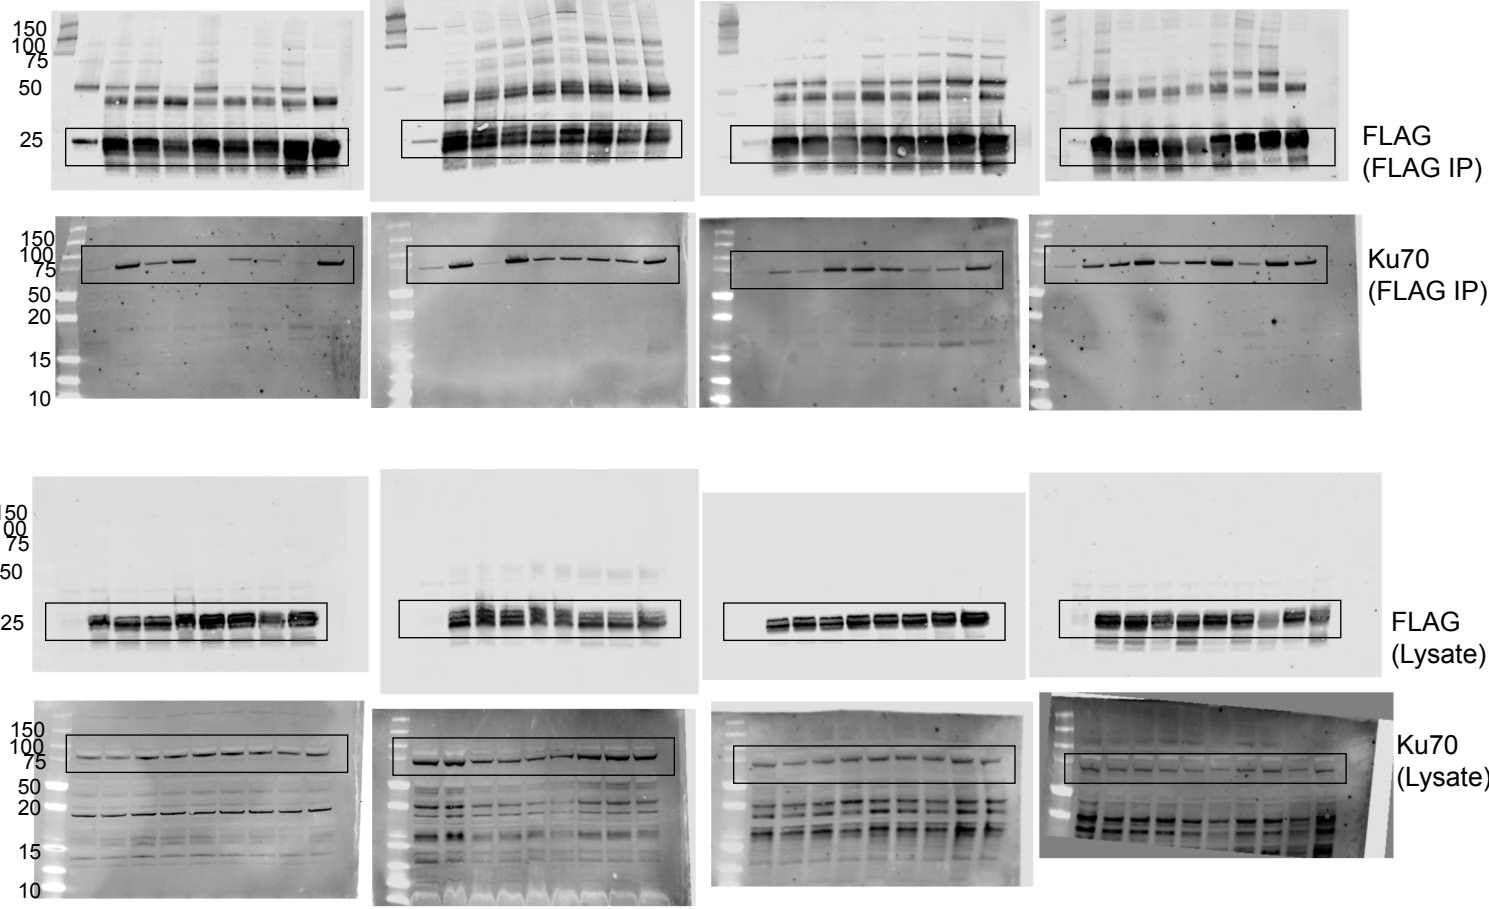

ED Fig 9a

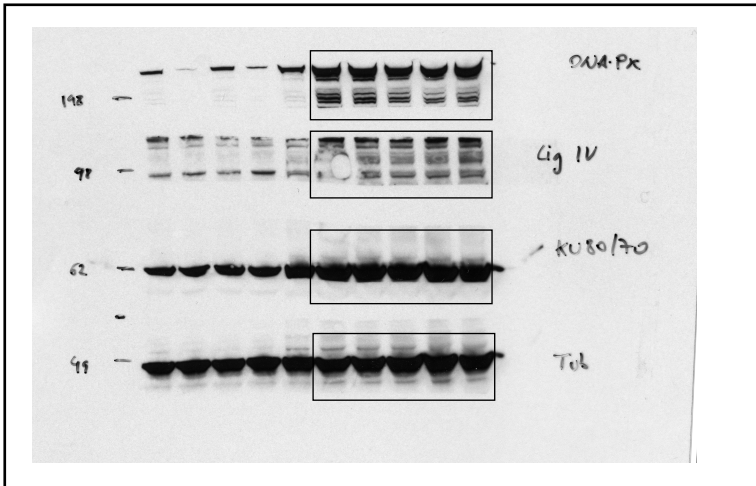

ED Fig 9b

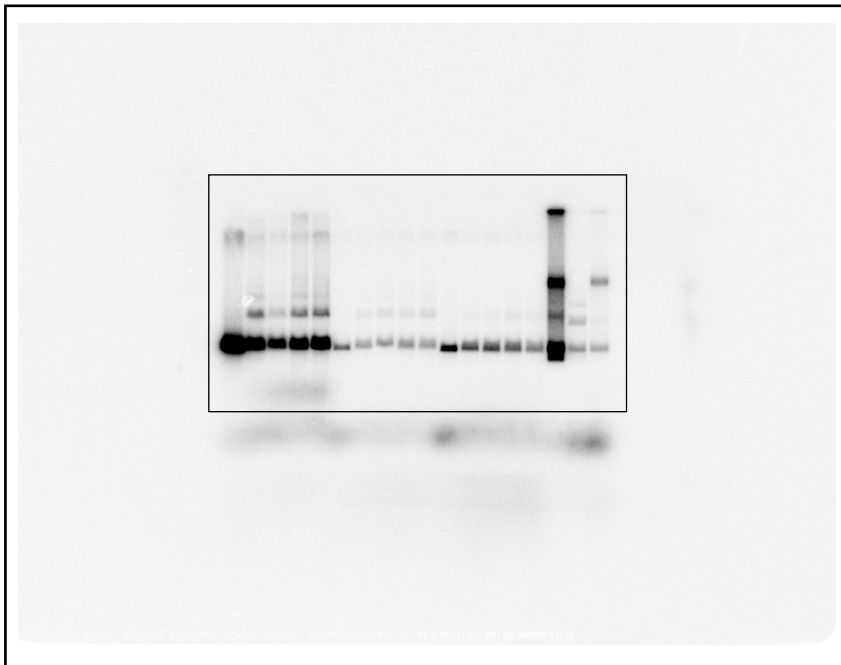

ED Fig 9c

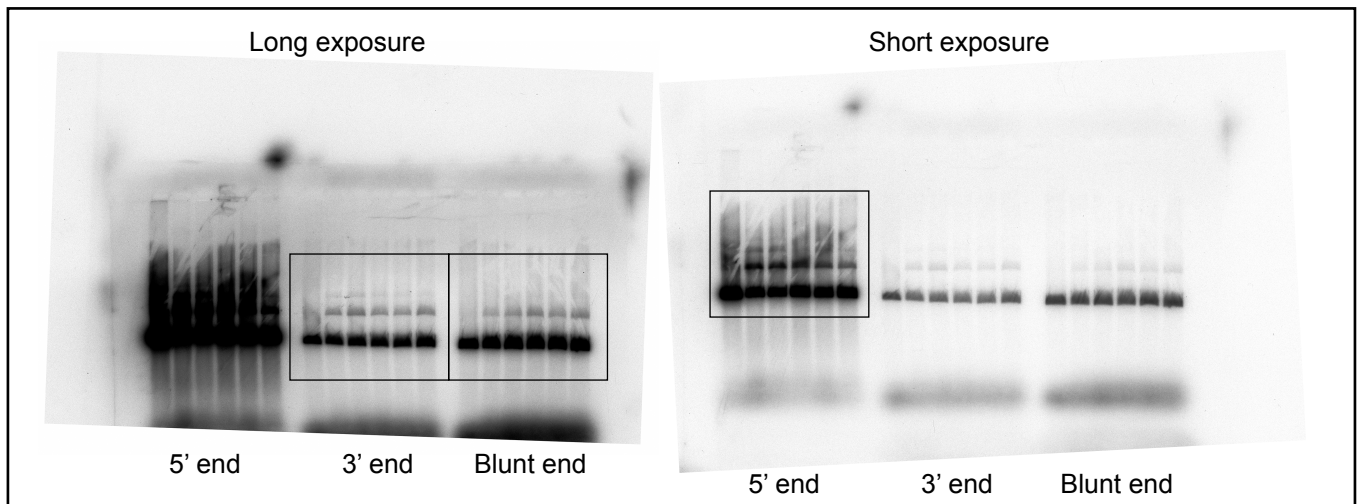

Supplement: NIHMS73757-supplement-Supplementary_Figure_1.pdf [file NIHMS73757-supplement-Supplementary_Figure_1.pdf]
